# Supplementary material for: Comprehensive and semi-quantitative analysis of carboxyl-containing metabolites related to gut microbiota on chronic kidney disease using 2-picolylamine isotopic labeling LC-MS/MS
Source: PubMed Central journal article supplement (PMC6910927; doi:10.1038/s41598-019-55600-1), 2019-12-13
Supplement: 41598_2019_55600_MOESM1_ESM.pdf [file 41598_2019_55600_MOESM1_ESM.pdf]

## **Supplementary Material**

### **Comprehensive and semi-quantitative analysis of carboxyl-containing metabolites related to gut microbiota on chronic kidney disease using 2-picolylamine isotopic labeling LC-MS/MS**

Yoshitomi Kanemitsu, Eikan Mishima, Masamitsu Maekawa, Yotaro Matsumoto, Daisuke Saigusa, Hiroaki Yamaguchi, Jiro Ogura, Hiroki Tsukamoto, Yoshihisa Tomioka, Takaaki Abe, and Nariyasu Mano

**Supplementary table S1. SRM transitions and compound-dependent parameters for CIL-LC-MS/MS analyses of the analytes**

| Analyte (abbreviation)                          | M+2PA                |                      |           |               | M+2PA-d6             |                      |           |               |
|-------------------------------------------------|----------------------|----------------------|-----------|---------------|----------------------|----------------------|-----------|---------------|
|                                                 | Q1<br>( <i>m/z</i> ) | Q3<br>( <i>m/z</i> ) | CE<br>(V) | S-lens<br>(V) | Q1<br>( <i>m/z</i> ) | Q3<br>( <i>m/z</i> ) | CE<br>(V) | S-lens<br>(V) |
| Cholic acid (CA)                                | 499.5                | 109.0                | 20        | 180           | 505.5                | 115.0                | 20        | 180           |
| $\alpha$ -muricholic acid (aMCA)                | 499.5                | 109.0                | 20        | 180           | 505.5                | 115.0                | 20        | 180           |
| $\beta$ -muricholic acid (bMCA)                 | 499.5                | 109.0                | 20        | 180           | 505.5                | 115.0                | 20        | 180           |
| $\omega$ -muricholic acid (wMCA)                | 499.5                | 109.0                | 20        | 180           | 505.5                | 115.0                | 20        | 180           |
| Hyochoolic acid (HCA)                           | 499.5                | 109.0                | 20        | 180           | 505.5                | 115.0                | 20        | 180           |
| Hyodeoxycholic acid (HDCA)                      | 483.5                | 109.0                | 20        | 180           | 489.5                | 115.0                | 20        | 180           |
| Chenodeoxycholic acid (CDCA)                    | 483.5                | 109.0                | 20        | 180           | 489.5                | 115.0                | 20        | 180           |
| Ursodeoxycholic acid (UDCA)                     | 483.5                | 109.0                | 20        | 180           | 489.5                | 115.0                | 20        | 180           |
| Deoxycholic acid (DCA)                          | 483.5                | 109.0                | 20        | 180           | 489.5                | 115.0                | 20        | 180           |
| Lithocholic acid (LCA)                          | 467.5                | 109.0                | 20        | 180           | 473.5                | 115.0                | 20        | 180           |
| Glycocholic acid (GCA)                          | 556.6                | 109.0                | 20        | 180           | 562.6                | 115.0                | 20        | 180           |
| Glyco- $\alpha$ -muricholic acid (GaMCA)        | 556.6                | 109.0                | 20        | 180           | 562.6                | 115.0                | 20        | 180           |
| Glyco- $\beta$ -muricholic acid (GbMCA)         | 556.6                | 109.0                | 20        | 180           | 562.6                | 115.0                | 20        | 180           |
| Glycohyochoolic acid (GHCA)                     | 556.6                | 109.0                | 20        | 180           | 562.6                | 115.0                | 20        | 180           |
| Glycohyodeoxycholic acid (GHDCa)                | 540.6                | 109.0                | 20        | 180           | 546.6                | 115.0                | 20        | 180           |
| Glycochenodeoxycholic acid (GCDCA)              | 540.6                | 109.0                | 20        | 180           | 546.6                | 115.0                | 20        | 180           |
| Glycoursodeoxycholic acid (GUDCA)               | 540.6                | 109.0                | 20        | 180           | 546.6                | 115.0                | 20        | 180           |
| Glycodeoxycholic acid (GDCA)                    | 540.6                | 109.0                | 20        | 180           | 546.6                | 115.0                | 20        | 180           |
| Glycolithocholic acid (GLCA)                    | 524.6                | 109.0                | 20        | 180           | 530.6                | 115.0                | 20        | 180           |
| Propanoic acid (C3:0)                           | 165.1                | 109.0                | 12        | 55            | 171.1                | 115.0                | 12        | 55            |
| Propanoic acid- <i>d</i> <sub>5</sub> (C3:0-d5) | 170.1                | 110.0                | 14        | 55            | 176.2                | 116.0                | 14        | 55            |
| Butyric acid (C4:0)                             | 179.1                | 109.0                | 12        | 66            | 185.1                | 115.0                | 12        | 66            |
| Butyric acid- <i>d</i> <sub>7</sub> (C4:0-d7)   | 186.2                | 110.0                | 14        | 66            | 192.2                | 116.0                | 14        | 66            |
| Lauric acid (C12:0)                             | 291.1                | 109.0                | 18        | 120           | 297.2                | 115.0                | 18        | 120           |
| Myristic acid (C14:0)                           | 319.3                | 109.0                | 18        | 119           | 325.3                | 115.0                | 18        | 119           |
| Palmitic acid (C16:0)                           | 347.3                | 109.0                | 18        | 119           | 353.3                | 115.0                | 18        | 120           |
| Palmitoleic acid (C16:1)                        | 345.3                | 109.0                | 18        | 120           | 351.2                | 115.0                | 18        | 100           |
| Stearic acid (C18:0)                            | 375.3                | 109.0                | 18        | 145           | 381.4                | 115.0                | 18        | 147           |
| Oleic acid (C18:1)                              | 373.1                | 109.0                | 18        | 140           | 379.4                | 115.0                | 18        | 148           |
| Arachidic acid (C20:0)                          | 403.4                | 109.0                | 18        | 151           | 409.4                | 115.0                | 18        | 150           |
| Lignoceric acid (C24:0)                         | 459.4                | 109.0                | 18        | 164           | 465.5                | 115.0                | 18        | 174           |
| Nervonic acid (C24:1)                           | 457.4                | 109.0                | 18        | 180           | 463.5                | 115.0                | 18        | 190           |
| Linoleic acid (C18:2)                           | 371.3                | 109.0                | 18        | 136           | 377.3                | 115.0                | 16        | 120           |
| $\alpha$ -Linolenic acid (C18:3 n-3)            | 369.3                | 109.0                | 19        | 90            | 375.2                | 115.0                | 22        | 100           |
| $\gamma$ -Linolenic acid (C18:3 n-6)            | 369.3                | 109.0                | 19        | 90            | 375.2                | 115.0                | 22        | 100           |
| Stearidonic acid (C18:4)                        | 367.3                | 109.0                | 18        | 130           | 373.1                | 115.0                | 18        | 110           |
| Dihomo- $\gamma$ -Linolenic acid (C20:3)        | 397.3                | 109.0                | 18        | 150           | 403.4                | 115.0                | 18        | 147           |
| Arachidonic acid (C20:4)                        | 395.3                | 109.0                | 18        | 105           | 401.3                | 115.0                | 18        | 82            |
| Eicosapentaenoic acid (C20:5)                   | 393.2                | 109.0                | 18        | 130           | 399.3                | 115.0                | 18        | 110           |
| Adrenic acid (C22:4)                            | 423.4                | 109.0                | 18        | 156           | 429.4                | 115.0                | 16        | 160           |
| Docosapentaenoic acid (C22:5)                   | 421.3                | 109.0                | 18        | 152           | 427.4                | 115.0                | 16        | 150           |
| Docosahexaenoic acid (C22:6)                    | 419.3                | 109.0                | 18        | 153           | 425.4                | 115.0                | 16        | 145           |
| Indole-3-acetic acid (IAA)                      | 266.1                | 109.0                | 19        | 100           | 272.2                | 115.0                | 19        | 108           |

CE; Collision energy

**Supplementary Table S2. Regression equations and Correlation coefficient of propanoic acid and butyric acid**

| Analyte        | Linear range ( $\mu\text{mol/L}$ ) | Regression equation      | Correlation coefficient |
|----------------|------------------------------------|--------------------------|-------------------------|
| Propanoic acid | 0.1 - 100                          | $Y = 0.04782 X + 0.0057$ | 0.999                   |
| Butyric acid   | 0.1 -25                            | $Y = 0.04494 X + 0.0142$ | 0.992                   |

**Supplementary Table S3. Intra-day precision and accuracy.**

| Analyte        | Spiked level ( $\mu\text{mol/L}$ ) | Human plasma <sup>†</sup> |               | Mouse plasma <sup>‡</sup> |               |
|----------------|------------------------------------|---------------------------|---------------|---------------------------|---------------|
|                |                                    | Accuracy (%)              | Precision (%) | Accuracy (%)              | Precision (%) |
| Propanoic acid | 0.5                                | -10.6                     | 6.9           | -                         | -             |
|                | 1                                  | 3.5                       | 7.5           | -1.6                      | 2.9           |
|                | 5                                  | -2.4                      | 3.5           | -                         | -             |
|                | 10                                 | 3.4                       | 1.7           | -4.8                      | 2.4           |
|                | 75                                 | 2.6                       | 1.7           | -                         | -             |
| Butyric acid   | 0.5                                | 4.0                       | 3.2           | -                         | -             |
|                | 1                                  | -4.5                      | 3.4           | 4.8                       | 6.1           |
|                | 5                                  | -9.8                      | 2.4           | -                         | -             |
|                | 10                                 | 0.6                       | 1.5           | -3.9                      | 1.7           |

<sup>†</sup>; propanoic acid : 2.86  $\mu\text{mol/L}$ , butyric acid : 0.76  $\mu\text{mol/L}$ . <sup>‡</sup>; propanoic acid: 4.11  $\mu\text{mol/L}$ , butyric acid: 1.17  $\mu\text{mol/L}$ . -; unexecuted

### A 0.1% AcOH

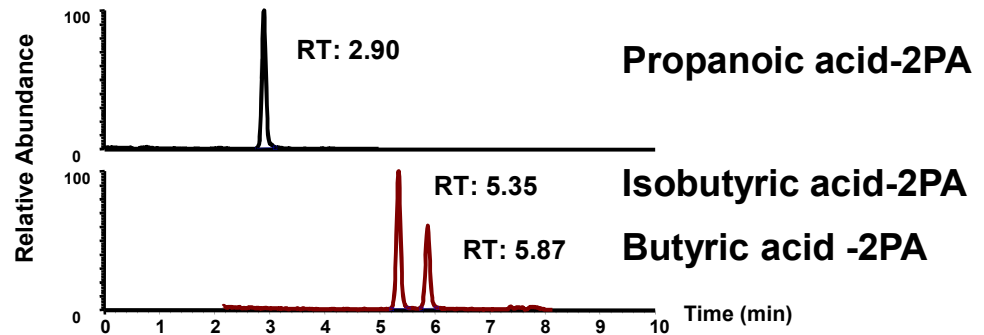

### B 0.3% AcOH

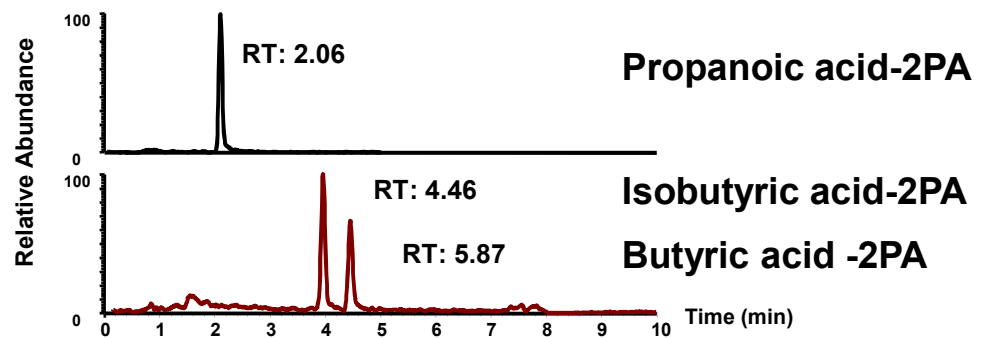

### C 0.1% HCOOH

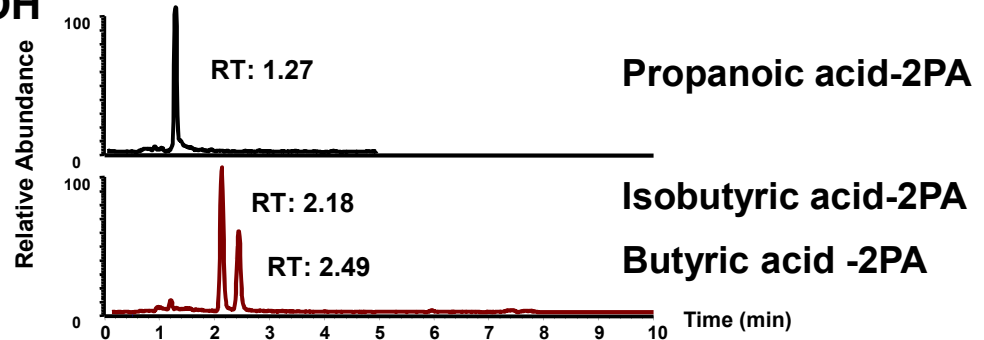

**Supplementary Figure S1. Comparison of SRM chromatograms of propanoic acid and butyric acid obtained from pooled mouse plasma.**

The experimental conditions were as follows: (A) 0.1% acetic acid added to the mobile phase, (B) 0.3% acetic acid added to the mobile phase, and (C) 0.1% formic acid added to the mobile phase.

### (A) Without derivatization

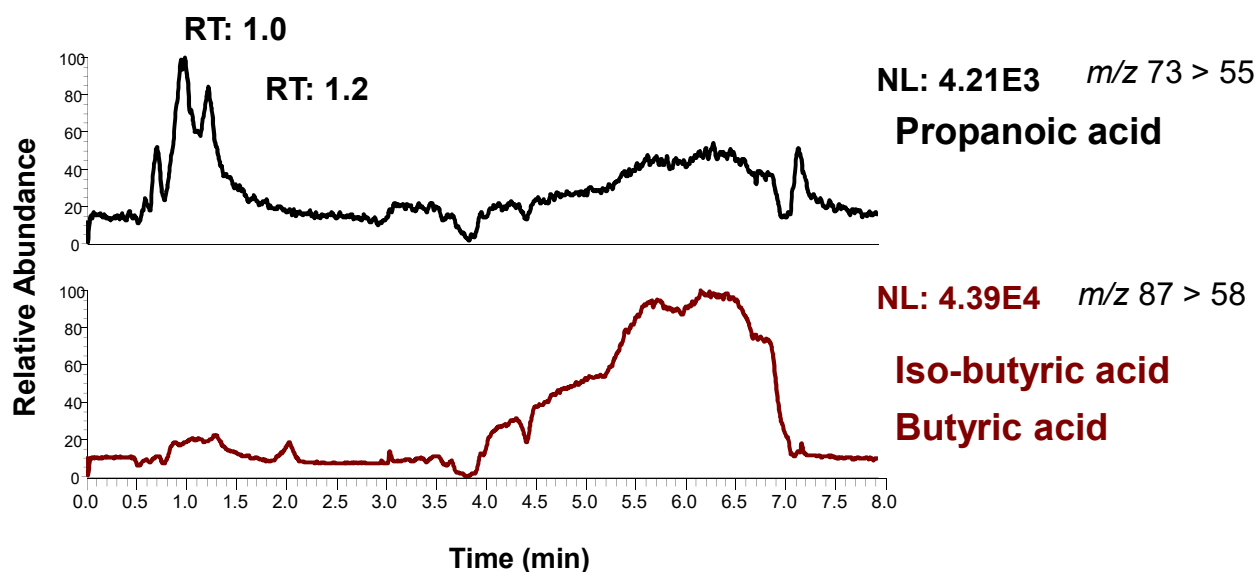

### (B) 2-PA derivatization

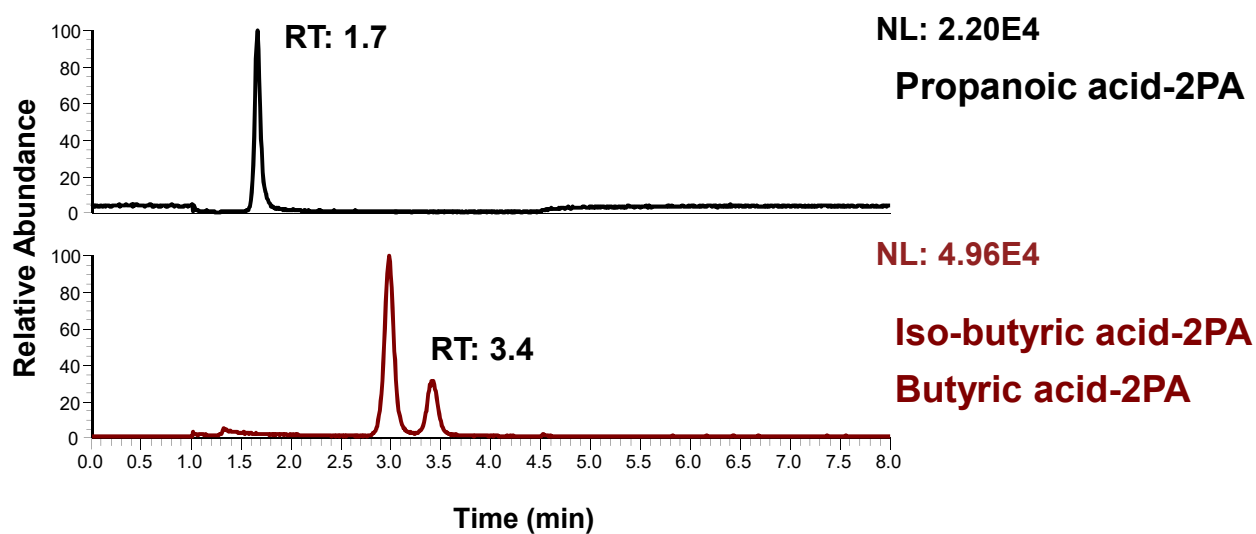

### Supplementary Figure S2. SRM chromatograms and signal intensities of propanoic acid and butyric acid.

(A) The QC sample (1  $\mu\text{mol/L}$  in human plasma) was analyzed without any derivatization (negative-ion mode), and (B) the same standard solutions were analyzed with the 2PA-derivatization (positive-ion mode).

### (A) Non-Siliconized 1.5 mL Tube

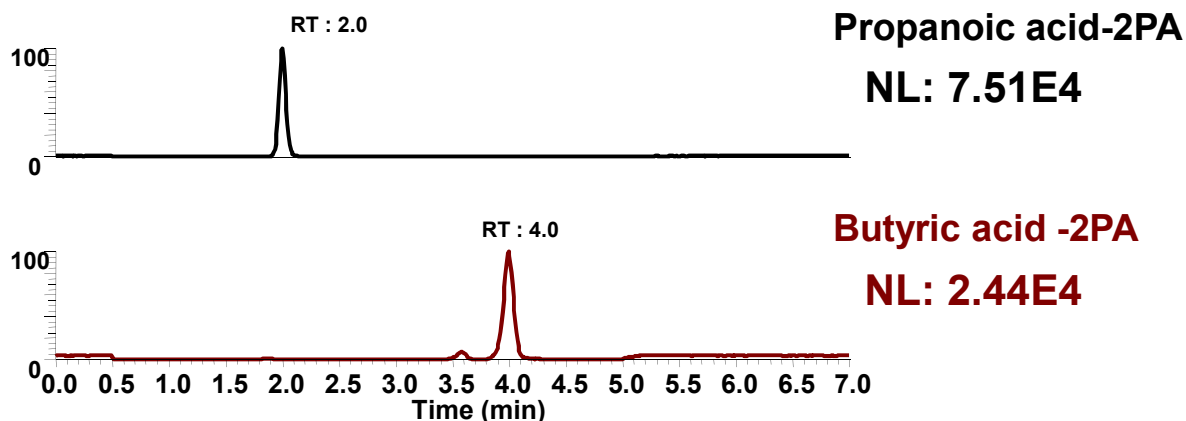

### (B) Glass tube

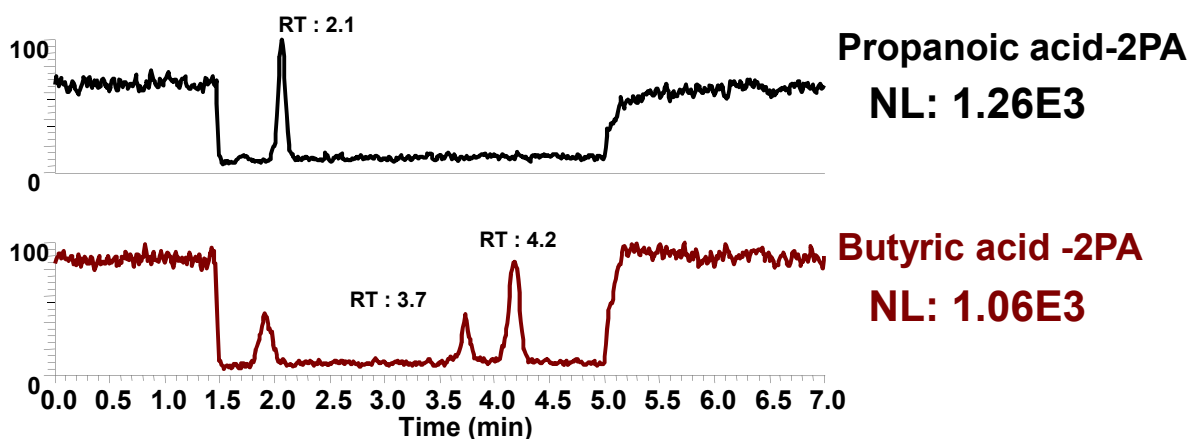

### (C) Siliconized 1.5 mL Tube

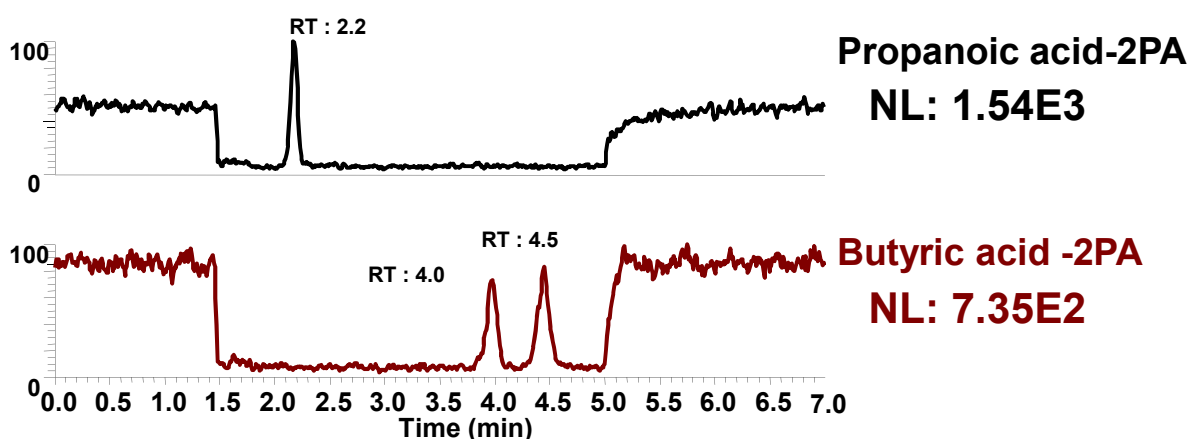

Supplementary Figure S3. SRM chromatograms and signal intensities obtained by using (A) non-siliconized plastic 1.5 mL tube, (B) glass tube, and (C) siliconized 1.5 mL tube.

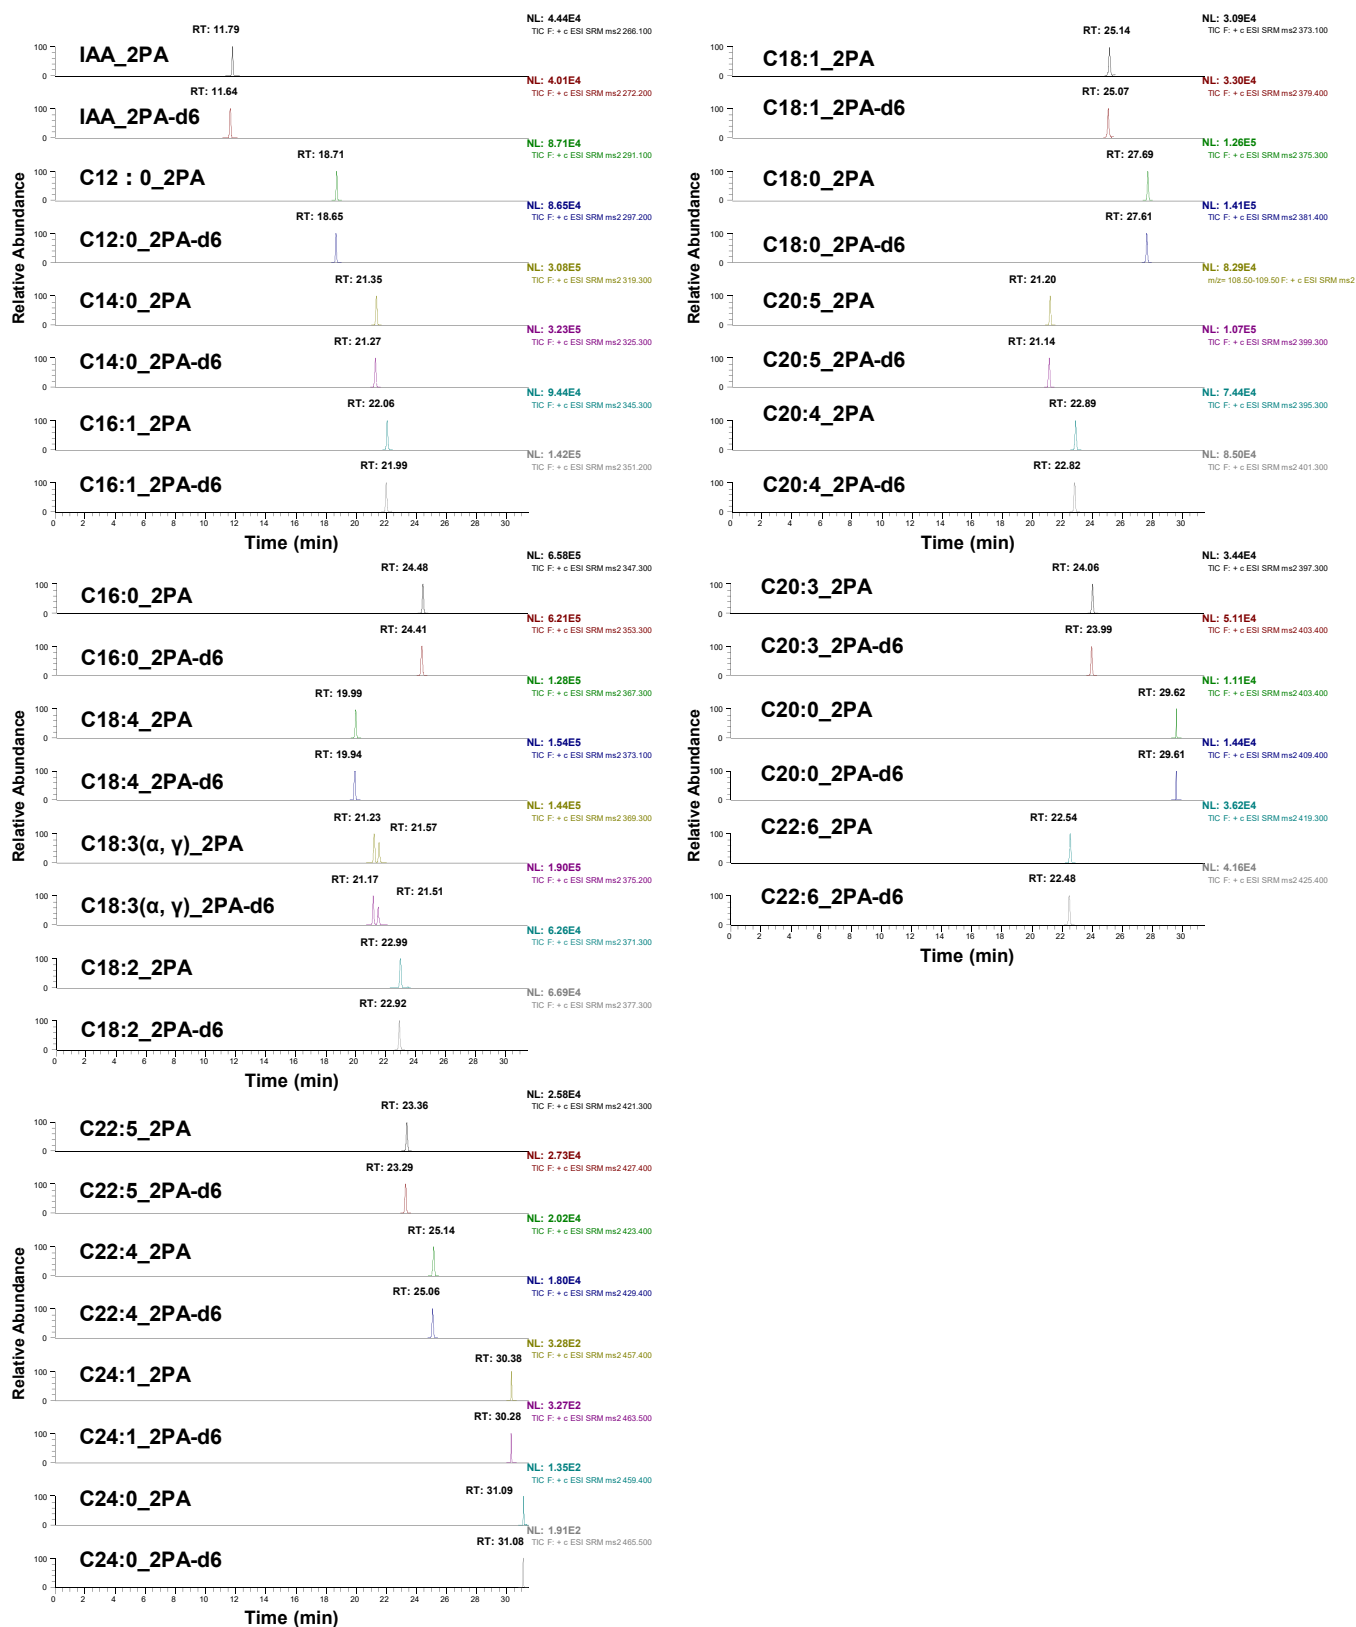

### Supplementary Figure S4. SRM chromatograms of 21 fatty acids and IAA

The standard mixture was labeled with either 2PA or 2PA-d6, and 1:1 mixture of the labeled compounds was analyzed by RPLC triple-quadrupole mass spectrometry.



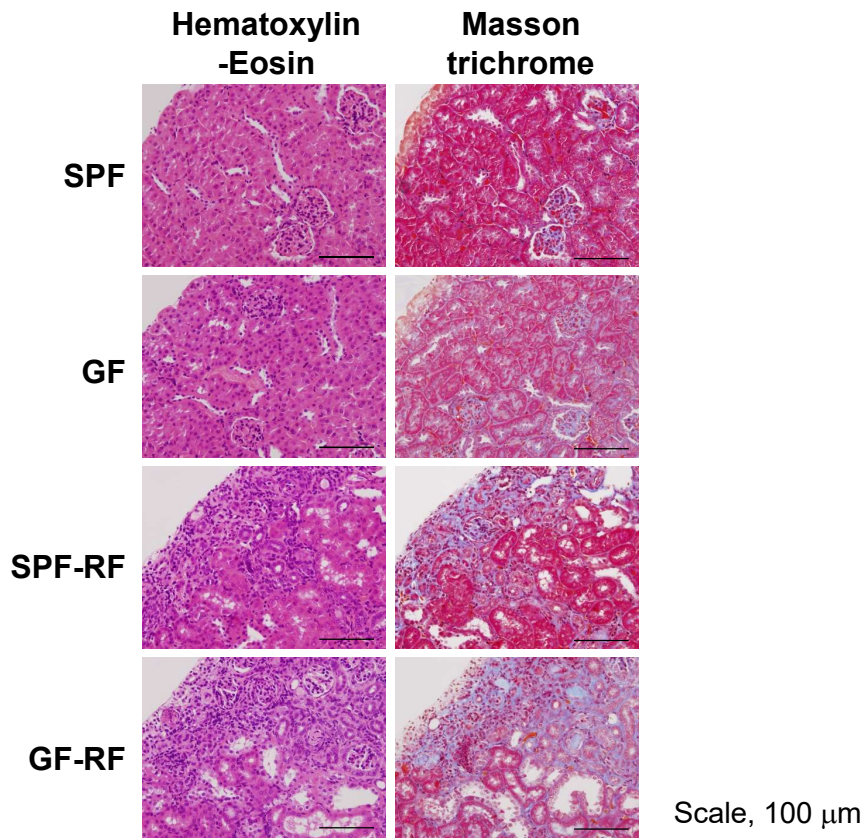

**Supplementary Figure S5. Histologic images of kidney sections with Hematoxylin and eosin (H&E) and Masson's trichrome staining. Bar = 100  $\mu$ m.**

Notice; these results are reanalysis data conducted on the sample which were collected at previous work and stored at  $-80^{\circ}\text{C}$  in our laboratory. (cf. *Kidney Int.*, 1–12, 2017).

A

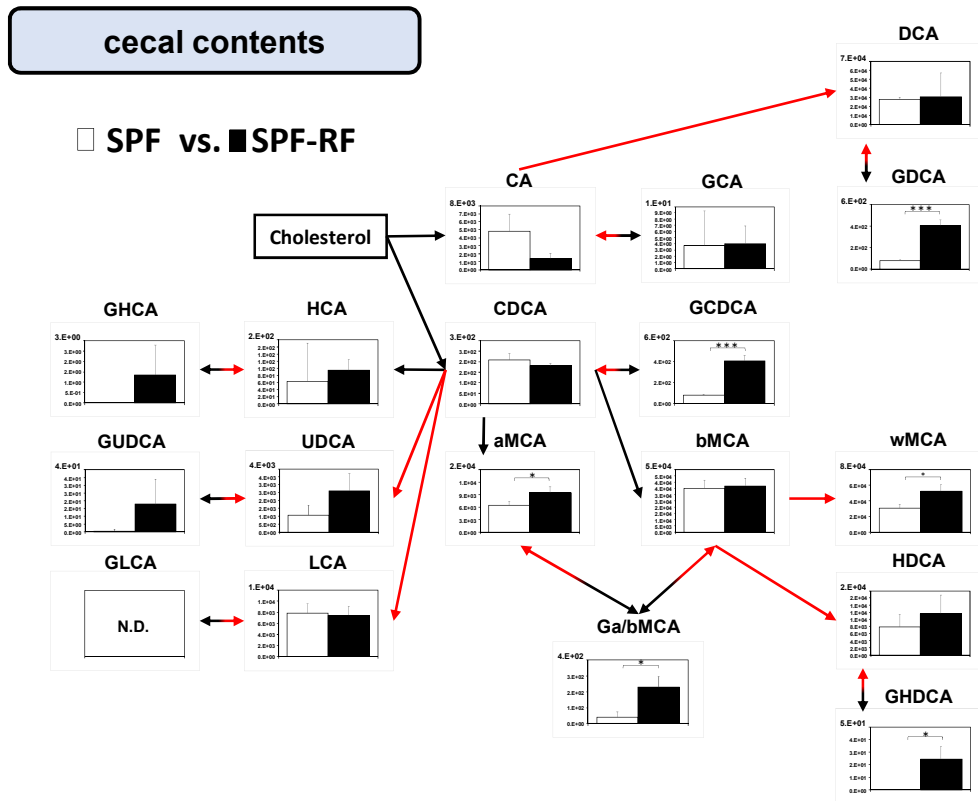

B

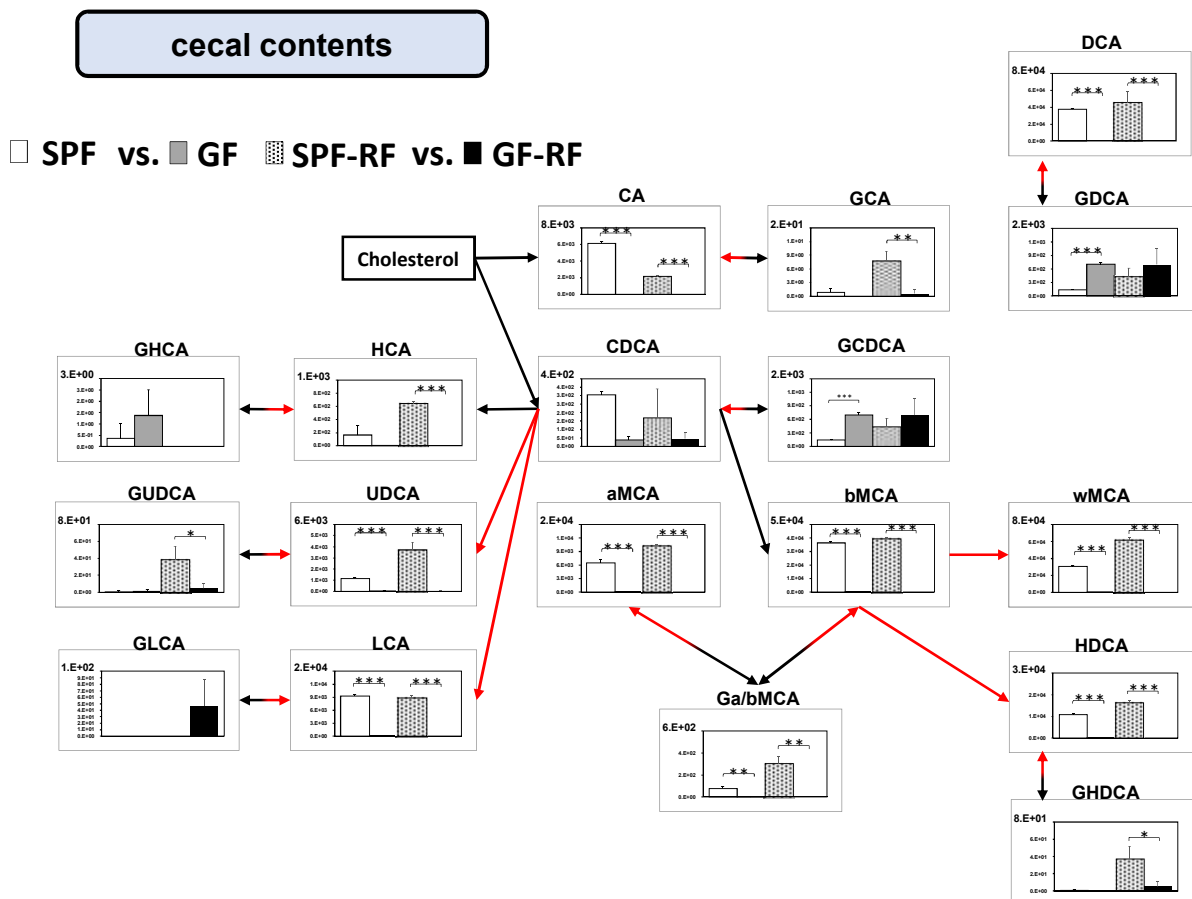

### Supplementary Figure S6. Reconstruction of bile acid metabolic pathways from 18 bile acids

Relative quantitative analysis of the bile acids in cecal contents between (A) SPF and SPF-RF groups. (B) SPF and GF groups, SPF-RF and GF-RF groups.

Metabolic pathways are involved in host and microbiota as indicated by black arrows and red arrows, respectively. Bars indicate means  $\pm$  SD of ion peak area in triplicate measurements. \* $P < 0.05$ , \*\* $P < 0.01$ , \*\*\* $P < 0.001$  compared between indicated groups (Student's t test). The pooled samples were prepared from each groups of mice; N = 4 in SPF control (SPF) and GF control (GF), and N = 3 in SPF renal failure (SPF-RF), and N = 5 GF renal failure (GF-RF) mice.

## cecal contents

□ SPF vs. ■ GF    ▨ SPF-RF vs. ■ GF-RF

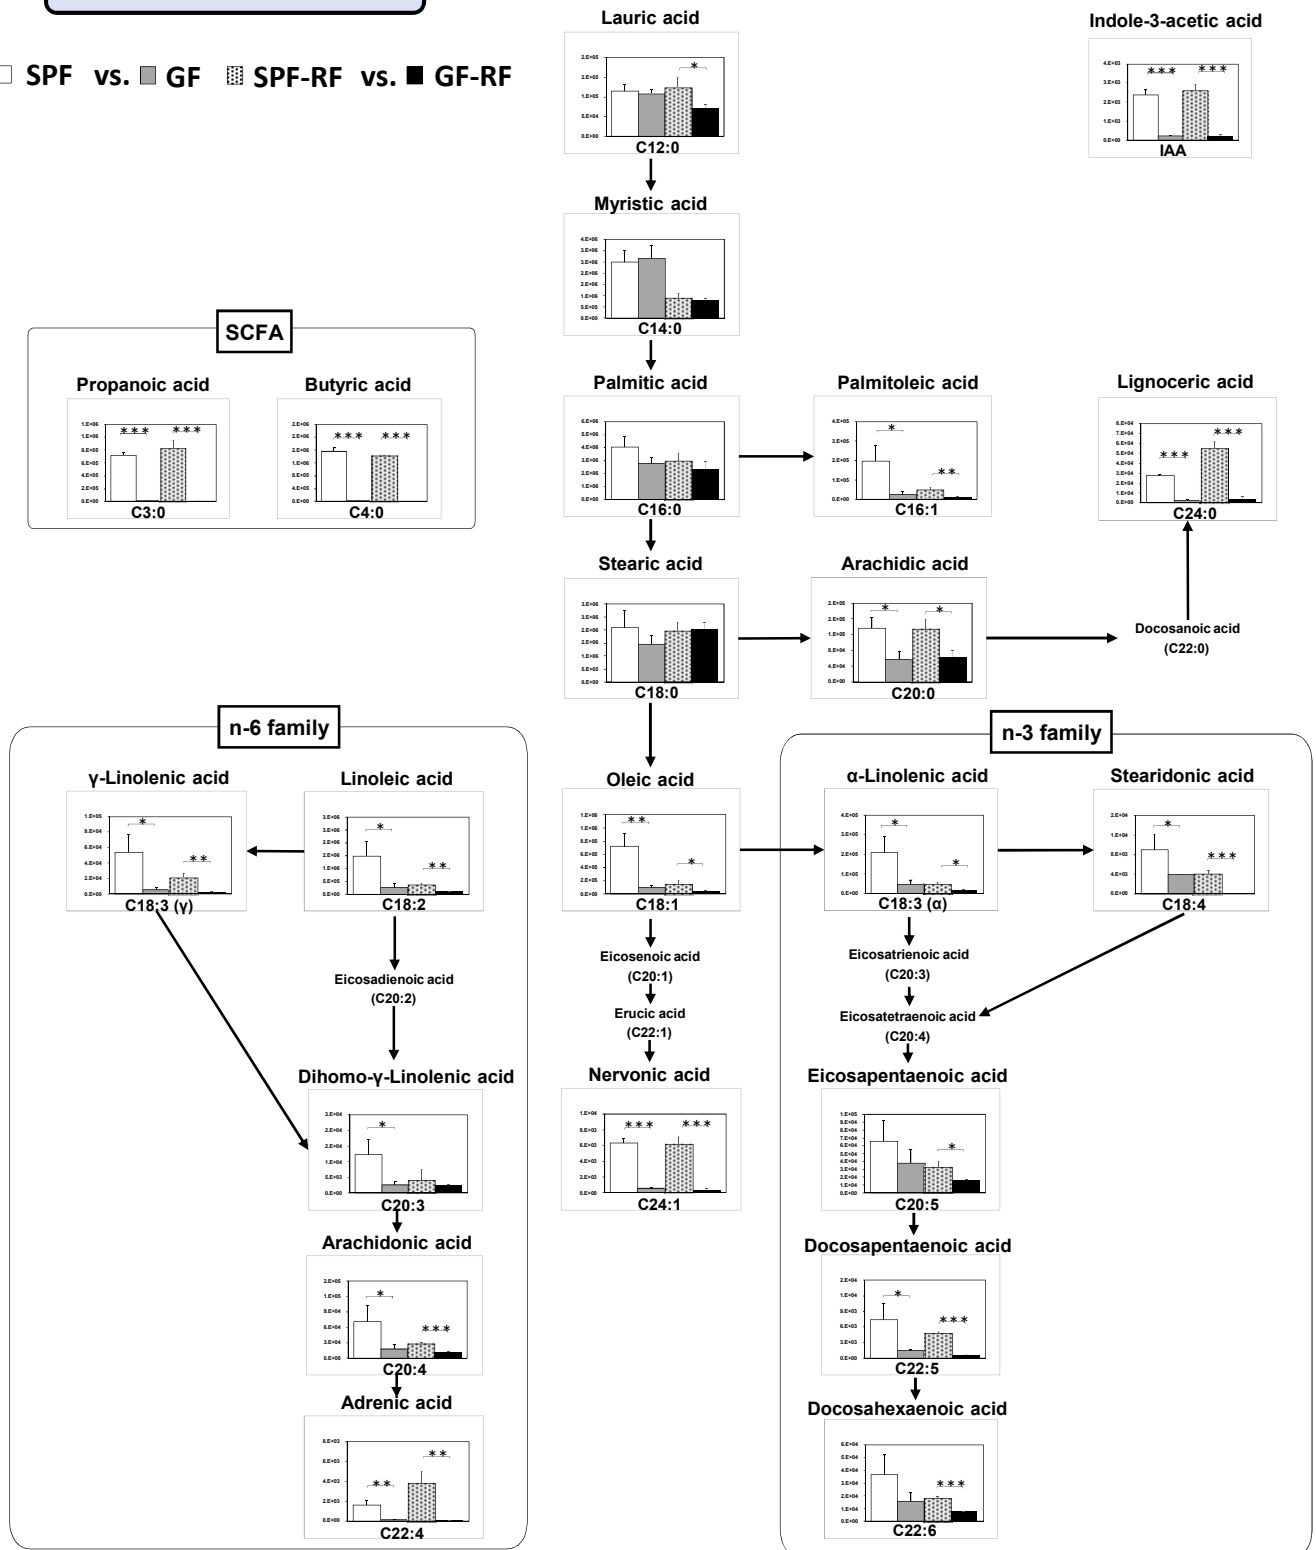

### Supplementary Figure S7. Reconstruction of integrate metabolic pathways from 19 fatty acids, SCFA, and IAA

Relative quantitative analysis of the fatty acids and IAA in cecal contents SPF and GF groups, SPF-RF and GF-RF groups. Bars indicate means  $\pm$  SD of ion peak area in triplicate measurements. \* $P < 0.05$ , \*\* $P < 0.01$ , \*\*\* $P < 0.001$  compared between indicated groups (Student's t test).

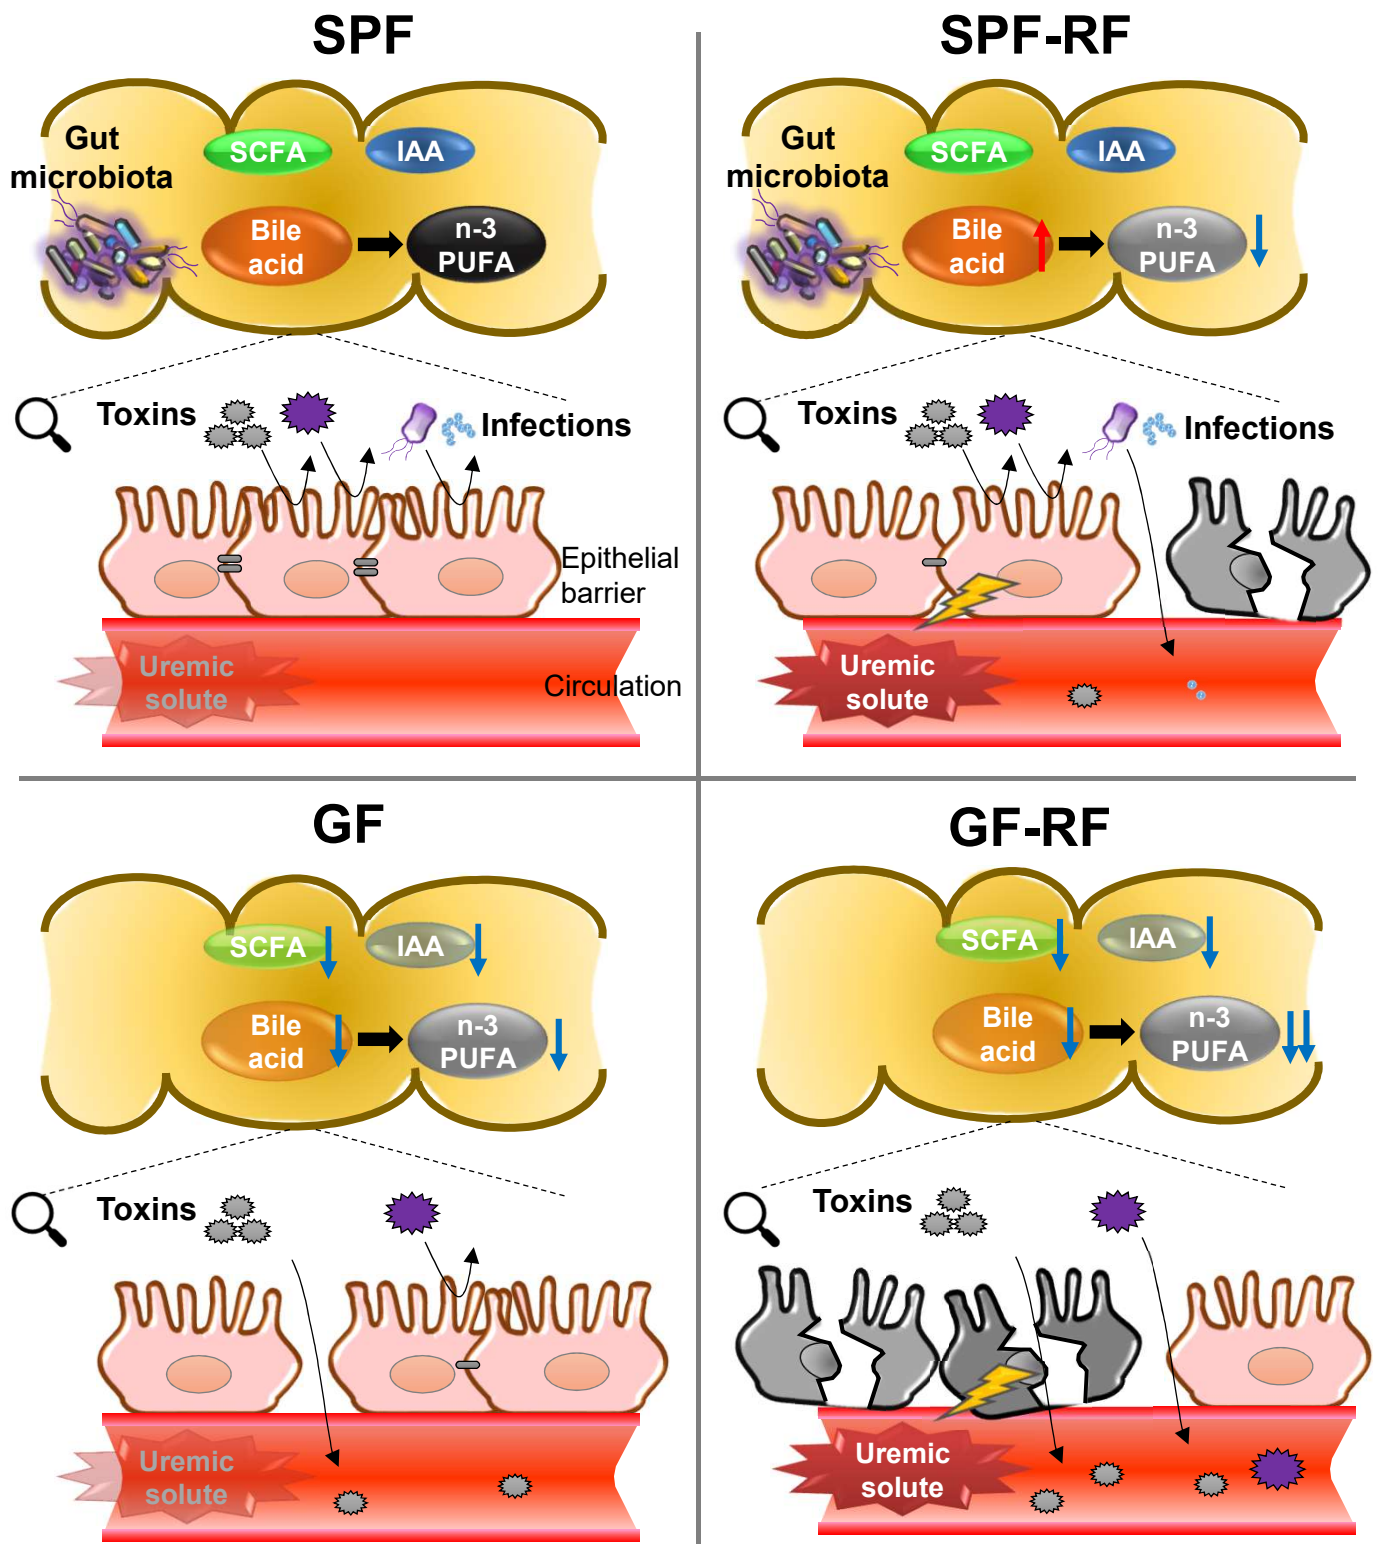

**Supplementary Figure S8. A schematic model of the generation and protective effect of microbiota-derived carboxyl-containing metabolites in SPF, SPF-RF, GF, and GF-RF mice.** Gut microbiota produces bile acids, SCFA, PUFA and IAA. Fatty acid is also derived from dietary sources. Germ-free conditions have deleterious effects on the intestinal carboxyl-containing metabolites level. Loss of the intestinal bile acids, n-3 PUFA, SCFA, and IAA accelerates epithelial barrier disruption, and induces inflammatory processes and the progression of renal failure in GF-RF mice.
